# Supplementary material for: Drosophila Hrp48 Is Required for Mushroom Body Axon Growth, Branching and Guidance
Source: PubMed Central journal article supplement (PMC4551846; doi:10.1371/journal.pone.0136610), 2015-08-27
Supplement: pone.0136610.s001.pdf [file pone.0136610.s001.pdf]

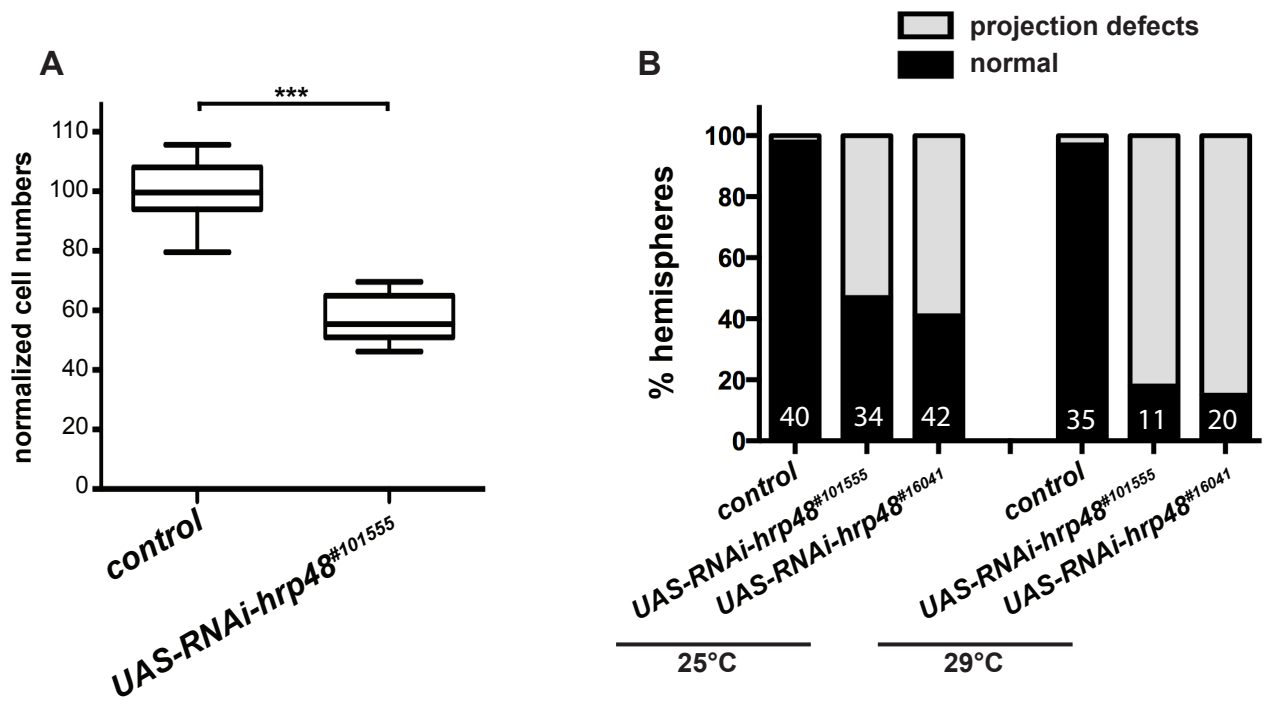

**Figure S1**
